# Supplementary material
Source: PubMed Central journal article supplement (PMC3758437)
Supplement: NIHMS463903-supplement-01.pdf [file NIHMS463903-supplement-01.pdf]

**Supplementary Table 1. Characteristics of Normal Subjects and Hemodialysis Patients**

|                                | <b>Normal Subjects<br/>Clearance Studies<br/>(n=5)</b> | <b>Hemodialysis<br/>Patients<br/>(n=6)</b> | <b>Normal Subjects<br/>Compared to<br/>Patients (n=6)</b> |
|--------------------------------|--------------------------------------------------------|--------------------------------------------|-----------------------------------------------------------|
| Age (yrs)                      | 40 ± 13                                                | 73 ± 12                                    | 46 ± 17                                                   |
| Gender (f/m)                   | 1/4                                                    | 0/6                                        | 2/4                                                       |
| BMI (kg/m <sup>2</sup> )       | 24 ± 3                                                 | 25 ± 3                                     | 27 ± 4                                                    |
| Dialysis Vintage (yrs)         | -                                                      | 4 ± 4                                      | -                                                         |
| Treatment Durations (hrs)      | -                                                      | 3.0 ± 0.4                                  | -                                                         |
| Blood Flow Rate (ml/min)       | -                                                      | 400                                        | -                                                         |
| Dialysate Flow Rate (ml/min)   | -                                                      | 800                                        | -                                                         |
| Monthly spKt/V <sub>urea</sub> | -                                                      | 1.50 ± 0.24                                | -                                                         |

Values are mean ± sd. Plasma and urine was obtained from a first group of normal subjects for solute clearance measurements. Studies comparing plasma solute levels in hemodialysis patients and normal subjects were done subsequently with plasma obtained pre-treatment from hemodialysis patients and from a second set of normal subjects because normal plasma used in the original clearance studies was depleted. This second group of normal subjects included 3 subjects who had been included in the original clearance studies. Dialyzers used in hemodialysis patients were Revaclear (n=3) and Revaclear Max (n=3).

**Supplementary Table 2 – Mass Spectrometric Features Potentially Representing Solutes Efficiently  
Cleared by the Kidney and Their Accumulation in Hemodialysis Patients**

| Neutral Mass          | Ion Mode | Clearance <sub>free</sub><br>(ml/min/1.73m <sup>2</sup> ) | Clearance <sub>total</sub><br>(ml/min/1.73m <sup>2</sup> ) | Free Fraction (%) | Reagent Standards Obtained   |                                          | Hemodialysis/Normal |                  |
|-----------------------|----------|-----------------------------------------------------------|------------------------------------------------------------|-------------------|------------------------------|------------------------------------------|---------------------|------------------|
|                       |          |                                                           |                                                            |                   | Matched                      | Not Matched                              | Free                | Total            |
| 205.0738              | neg      | 7343 ± 567                                                | 294 ± 71                                                   | 4 ± 1             | Cinnamoylglycine             | Indolelactic acid                        | 121 <sup>e</sup>    | 39 <sup>e</sup>  |
| 303.1248 <sup>a</sup> | pos      | 7023 ± 3219                                               | 121 ± 25                                                   | 2 ± 1             |                              |                                          | *                   | *                |
| 466.2571              | neg      | 4366 ± 1325                                               | 65 ± 9                                                     | 2 ± 1             |                              |                                          | 39 <sup>e</sup>     | 25 <sup>e</sup>  |
| 186.0893              | neg      | 4205 ± 1421                                               | 748 ± 148                                                  | 24 ± 6            |                              |                                          | 217 <sup>e</sup>    | 25 <sup>e</sup>  |
| 396.0728 <sup>a</sup> | neg      | 3994 ± 2046                                               | 885 <sup>b</sup>                                           | 68 <sup>b</sup>   |                              |                                          | 6 <sup>e</sup>      | 7 <sup>e</sup>   |
| 229.0046 <sup>a</sup> | neg      | 3762 ± 2591                                               | 564 ± 296                                                  | 17 ± 10           |                              |                                          | 391 <sup>e</sup>    | 84 <sup>e</sup>  |
| 288.0307              | neg      | 3668 ± 1631                                               | 415 ± 121                                                  | 13 ± 5            |                              |                                          | *                   | *                |
| 195.0531              | neg      | 3617 ± 3618                                               | 1137 ± 957                                                 | 35 ± 6            | 3-OH Hippuric acid           | 2-OH Hippuric acid<br>4-OH Hippuric acid | 46 <sup>e</sup>     | 33 <sup>e</sup>  |
| 214.1207              | neg      | 3242 ± 1009                                               | 98 ± 10                                                    | 3 ± 1             |                              |                                          | 14 <sup>e</sup>     | 7 <sup>e</sup>   |
| 457.1942 <sup>a</sup> | pos      | 3085 ± 544                                                | 485 ± 140                                                  | 17 ± 5            |                              |                                          | 175 <sup>e</sup>    | 86 <sup>e</sup>  |
| 213.0096              | neg      | 3023 ± 533                                                | 59 ± 12                                                    | 2 ± 1             | Indoxyl sulfate              |                                          | 85 <sup>e</sup>     | 26 <sup>e</sup>  |
| 180.0532              | pos      | 2984 ± 1166                                               | 697 ± 239                                                  | 24 ± 7            |                              | Nicotinuric acid                         | 58 <sup>e</sup>     | 35 <sup>e</sup>  |
| 440.1687 <sup>a</sup> | neg      | 2921 ± 755                                                | 470 ± 146                                                  | 17 ± 6            |                              |                                          | 243 <sup>e</sup>    | 112 <sup>e</sup> |
| 210.0753              | neg      | 2896 ± 1117                                               | 236 ± 40                                                   | 9 ± 3             | 1,3,7-<br>Trimethyluric acid |                                          | 5 <sup>e</sup>      | 2                |
| 199.1209              | neg      | 2850 ± 737                                                | 410 ± 52                                                   | 16 ± 4            |                              | Ecgonine methyl ester                    | 16 <sup>e</sup>     | 6 <sup>e</sup>   |
| 200.0144 <sup>a</sup> | neg      | 2789 ± 590                                                | 4 ± 0.5                                                    | 0.2 ± 0.05        |                              |                                          | 64 <sup>e</sup>     | 9 <sup>e</sup>   |
| 169.0376              | neg      | 2733 ± 1282                                               | 903 <sup>b</sup>                                           | 49 <sup>b</sup>   | 2-Furoylglycine              |                                          | 86 <sup>e</sup>     | 64 <sup>e</sup>  |
| 332.1841              | neg      | 2471 ± 1426                                               | 335 ± 157                                                  | 14 ± 4            |                              |                                          | 100 <sup>e</sup>    | 29 <sup>e</sup>  |
| 160.0736              | neg      | 2456 ± 578                                                | 186 ± 63                                                   | 8 ± 5             | <sup>d</sup> see legend      |                                          | 43 <sup>e</sup>     | 7 <sup>e</sup>   |
| 325.0801 <sup>a</sup> | neg      | 2441 ± 1123                                               | 870 ± 191                                                  | 56 ± 30           |                              |                                          | 395 <sup>e</sup>    | 201 <sup>e</sup> |
| 194.0690              | pos      | 2368 ± 655                                                | 423 <sup>b</sup>                                           | 34 <sup>b</sup>   |                              | 4-Aminohippuric acid                     | 108 <sup>e</sup>    | 81 <sup>e</sup>  |

|                       |     |             |                  |                 |                       |                                                          |                  |                 |
|-----------------------|-----|-------------|------------------|-----------------|-----------------------|----------------------------------------------------------|------------------|-----------------|
| 182.0580              | neg | 2264 ± 1075 | c                | c               |                       | Homovanillic acid<br>3-(4-Hydroxyphenyl)lactate          | 4 <sup>e</sup>   | 3 <sup>e</sup>  |
| 158.0578              | neg | 2241 ± 420  | 472 ± 98         | 21 ± 4          |                       | Succinylacetone                                          | 211 <sup>e</sup> | 16 <sup>e</sup> |
| 218.0249              | neg | 2107 ± 721  | 12 ± 4           | 0.5 ± 0.2       |                       |                                                          | 8 <sup>e</sup>   | 2 <sup>e</sup>  |
| 278.1296              | pos | 2032 ± 854  | 19 ± 2           | 1 ± 0.3         |                       |                                                          | *                | *               |
| 270.1939 <sup>a</sup> | pos | 2031 ± 1399 | 14 ± 21          | 0.9 ± 1.5       |                       |                                                          | 11 <sup>e</sup>  | 4 <sup>e</sup>  |
| 132.0424              | neg | 1988 ± 447  | 242 ± 127        | 11 ± 4          | Methylsuccinic acid   | Glutaric acid                                            | 119 <sup>e</sup> | 6 <sup>e</sup>  |
| 150.0539              | pos | 1985 ± 610  | 284 ± 59         | 15 ± 3          |                       |                                                          | 48 <sup>e</sup>  | 23 <sup>e</sup> |
| 196.0595              | neg | 1977 ± 2238 | 489 ± 293        | 39 ± 30         | 1,7-Dimethyluric acid | 1,3-Dimethyluric acid                                    | 8 <sup>e</sup>   | 7 <sup>e</sup>  |
| 250.0698 <sup>a</sup> | pos | 1937 ± 702  | 434 ± 24         | 20 ± 5          |                       |                                                          | 33 <sup>e</sup>  | 26 <sup>e</sup> |
| 273.1758 <sup>a</sup> | pos | 1906 ± 476  | 31 ± 17          | 1 ± 0.9         |                       |                                                          | *                | *               |
| 188.0687 <sup>a</sup> | neg | 1891 ± 283  | 219 ± 100        | 13 ± 7          |                       |                                                          | *                | *               |
| 101.0113 <sup>a</sup> | neg | 1885 ± 709  | 360 ± 86         | 19 ± 4          |                       |                                                          | 174 <sup>e</sup> | 69 <sup>e</sup> |
| 384.1613              | neg | 1882 ± 1658 | 5 ± 4            | 0.3 ± 0.2       |                       |                                                          | 3 <sup>e</sup>   | 2               |
| 179.0583              | neg | 1868 ± 1312 | 502 ± 397        | 27 ± 5          | Hippuric acid         |                                                          | 53 <sup>e</sup>  | 31 <sup>e</sup> |
| 189.9936 <sup>a</sup> | neg | 1805 ± 1222 | 349 <sup>b</sup> | 11 <sup>b</sup> |                       |                                                          | *                | *               |
| 323.1938 <sup>a</sup> | pos | 1794 ± 1337 | 25 ± 26          | 3 ± 4           |                       |                                                          | *                | *               |
| 218.1156              | neg | 1737 ± 1076 | 468 <sup>b</sup> | 57 <sup>b</sup> |                       |                                                          | 10 <sup>e</sup>  | 8 <sup>e</sup>  |
| 247.1603 <sup>a</sup> | pos | 1692 ± 776  | 190 ± 89         | 12 ± 6          |                       |                                                          | *                | *               |
| 270.1575 <sup>a</sup> | pos | 1691 ± 413  | 568 ± 143        | 34 ± 4          |                       |                                                          | 14 <sup>e</sup>  | 11 <sup>e</sup> |
| 268.1313              | neg | 1675 ± 1517 | 1 ± 1            | 0.07 ± 0.03     |                       |                                                          | *                | *               |
| 303.1215              | pos | 1648 ± 535  | c                | c               |                       |                                                          | 96 <sup>e</sup>  | 70 <sup>e</sup> |
| 482.2526              | neg | 1602 ± 797  | 74 ± 26          | 6 ± 4           |                       |                                                          | 87 <sup>e</sup>  | 46 <sup>e</sup> |
| 166.0488              | pos | 1594 ± 1825 | 342 ± 182        | 43 ± 35         |                       | 1-Methylxanthine<br>3-Methylxanthine<br>7-Methylxanthine | 17 <sup>e</sup>  | 9 <sup>e</sup>  |
| 278.9832 <sup>a</sup> | neg | 1529 ± 1802 | 134 ± 45         | 18 ± 2          |                       |                                                          | 20 <sup>e</sup>  | 13 <sup>e</sup> |
| 159.0892              | pos | 1498 ± 324  | 436 ± 38         | 30 ± 6          | Isovalerylglycine     | 2-Methylbutyrylglycine                                   | 46 <sup>e</sup>  | 9 <sup>e</sup>  |

|                       |     |             |                  |                 |               |  |                  |                  |
|-----------------------|-----|-------------|------------------|-----------------|---------------|--|------------------|------------------|
| 222.0893              | neg | 1497 ± 1695 | 217 ± 227        | 18 ± 4          |               |  | 10 <sup>e</sup>  | 5 <sup>e</sup>   |
| 282.1210              | pos | 1488 ± 386  | c                | c               |               |  | 53 <sup>e</sup>  | 20 <sup>e</sup>  |
| 338.1460 <sup>a</sup> | neg | 1479 ± 312  | 408 <sup>b</sup> | 44 <sup>b</sup> |               |  | *                | *                |
| 453.1996 <sup>a</sup> | pos | 1473 ± 326  | 198 ± 15         | 15 ± 6          |               |  | *                | *                |
| 231.0201 <sup>a</sup> | neg | 1469 ± 594  | 232 ± 37         | 17 ± 6          |               |  | 3 <sup>e</sup>   | 1                |
| 336.1681 <sup>a</sup> | pos | 1436 ± 943  | c                | c               |               |  | *                | *                |
| 309.0164 <sup>a</sup> | neg | 1425 ± 1931 | 96 ± 34          | 17 ± 2          |               |  | 14 <sup>e</sup>  | 8 <sup>e</sup>   |
| 122.0369              | neg | 1424 ± 582  | 335 ± 202        | 26 ± 15         |               |  | 40 <sup>e</sup>  | 9 <sup>e</sup>   |
| 426.1535              | neg | 1391 ± 474  | 127 ± 14         | 10 ± 4          |               |  | 174 <sup>e</sup> | 67 <sup>e</sup>  |
| 198.0750              | pos | 1378 ± 576  | 460 ± 35         | 56 ± 31         |               |  | 100 <sup>e</sup> | 46 <sup>e</sup>  |
| 283.0543 <sup>a</sup> | pos | 1378 ± 550  | c                | c               |               |  | 34 <sup>e</sup>  | 5 <sup>e</sup>   |
| 171.0896 <sup>a</sup> | neg | 1373 ± 516  | 435 <sup>b</sup> | 23 <sup>b</sup> |               |  | 67 <sup>e</sup>  | 30 <sup>e</sup>  |
| 244.1312              | neg | 1360 ± 452  | 512 ± 301        | 53 ± 7          |               |  | 15 <sup>e</sup>  | 11 <sup>e</sup>  |
| 238.1313 <sup>a</sup> | pos | 1294 ± 573  | c                | c               |               |  | 132 <sup>e</sup> | 32               |
| 256.1418 <sup>a</sup> | pos | 1284 ± 362  | 538 ± 260        | 44 ± 22         |               |  | 185 <sup>e</sup> | 135 <sup>e</sup> |
| 329.2202              | pos | 1255 ± 388  | 523 ± 164        | 43 ± 13         |               |  | 22 <sup>e</sup>  | 27 <sup>e</sup>  |
| 352.0776 <sup>a</sup> | neg | 1247 ± 197  | 457 ± 51         | 40 ± 9          |               |  | 57 <sup>e</sup>  | 71 <sup>e</sup>  |
| 289.1459 <sup>a</sup> | pos | 1237 ± 591  | 195 ± 47         | 17 ± 4          |               |  | *                | *                |
| 223.1206 <sup>a</sup> | pos | 1225 ± 422  | 50 ± 13          | 4 ± 1           |               |  | 6 <sup>e</sup>   | 2 <sup>e</sup>   |
| 246.1468              | neg | 1220 ± 722  | 247 ± 67         | 28 ± 12         |               |  | 2 <sup>e</sup>   | 1                |
| 374.1219              | neg | 1219 ± 84   | c                | c               |               |  | *                | *                |
| 232.0039              | neg | 1219 ± 1463 | 99 ± 96          | 10 ± 7          |               |  | 103 <sup>e</sup> | 64 <sup>e</sup>  |
| 320.1113 <sup>a</sup> | neg | 1180 ± 112  | 285 ± 30         | 25 ± 3          |               |  | 167 <sup>e</sup> | 48 <sup>e</sup>  |
| 204.0093 <sup>a</sup> | neg | 1174 ± 405  | 38 ± 11          | 3 ± 1           |               |  | 8                | 3                |
| 346.1633              | neg | 1169 ± 855  | 812 <sup>b</sup> | 67 <sup>b</sup> |               |  | 304 <sup>e</sup> | 161 <sup>e</sup> |
| 265.0945 <sup>a</sup> | pos | 1161 ± 404  | c                | c               |               |  | 403 <sup>e</sup> | 220 <sup>e</sup> |
| 337.1367              | pos | 1151 ± 156  | c                | c               |               |  | 90 <sup>e</sup>  | 42 <sup>e</sup>  |
| 157.0737              | pos | 1148 ± 235  | 575 ± 190        | 52 ± 19         | Tiglylglycine |  | 59 <sup>e</sup>  | 36 <sup>e</sup>  |

|                       |     |             |                  |                 |                  |                                                |                  |                  |
|-----------------------|-----|-------------|------------------|-----------------|------------------|------------------------------------------------|------------------|------------------|
| 185.1048              | pos | 1147 ± 547  | c                | c               |                  |                                                | 7 <sup>e</sup>   | 7 <sup>e</sup>   |
| 348.1787              | neg | 1146 ± 413  | c                | c               |                  |                                                | 440 <sup>e</sup> | 176 <sup>e</sup> |
| 581.1344 <sup>a</sup> | neg | 1146 ± 371  | c                | c               |                  |                                                | *                | *                |
| 258.1576 <sup>a</sup> | pos | 1142 ± 295  | 329 <sup>b</sup> | 51 <sup>b</sup> |                  |                                                | *                | *                |
| 327.2042 <sup>a</sup> | pos | 1133 ± 367  | c                | c               |                  |                                                | *                | *                |
| 258.0313 <sup>a</sup> | pos | 1131 ± 1108 | 123 ± 49         | 19 ± 4          |                  |                                                | 13 <sup>e</sup>  | 8 <sup>e</sup>   |
| 283.1797 <sup>a</sup> | pos | 1126 ± 701  | 14 ± 7           | 0.9 ± 0.9       |                  |                                                | *                | *                |
| 272.1629 <sup>a</sup> | neg | 1105 ± 309  | 30 ± 29          | 4 ± 2           |                  |                                                | 2 <sup>e</sup>   | 1                |
| 146.0580              | neg | 1100 ± 304  | 42 ± 10          | 4 ± 1           | Adipic acid      | 2-Methylglutaric acid<br>3-Methylglutaric acid | 25 <sup>e</sup>  | 16 <sup>e</sup>  |
| 268.1419 <sup>a</sup> | pos | 1083 ± 358  | c                | c               |                  |                                                | 35 <sup>e</sup>  | 18               |
| 280.1055              | pos | 1065 ± 611  | 347 ± 17         | 68 ± 31         |                  | L-Aspartyl-L-phenylalanine                     | 260 <sup>e</sup> | 178 <sup>e</sup> |
| 260.1262              | neg | 1062 ± 252  | c                | c               |                  |                                                | *                | *                |
| 311.1224              | pos | 1060 ± 384  | 458 ± 49         | 50 ± 26         |                  |                                                | 25 <sup>e</sup>  | 13 <sup>e</sup>  |
| 300.1315 <sup>a</sup> | pos | 1059 ± 204  | 360 <sup>b</sup> | 46 <sup>b</sup> |                  |                                                | 342 <sup>e</sup> | 57 <sup>e</sup>  |
| 188.0144              | neg | 1055 ± 148  | 20 ± 3           | 2 ± 0.5         | p-Cresol sulfate |                                                | 38 <sup>e</sup>  | 10 <sup>e</sup>  |
| 174.0892              | neg | 1041 ± 147  | 69 ± 13          | 7 ± 2           | Suberic acid     |                                                | 43 <sup>e</sup>  | 5 <sup>e</sup>   |

The table includes 90 features identified by high resolution mass spectrometry as representing solutes efficiently cleared by the native kidney. Values are mean±sd. <sup>a</sup> indicates features for which HMDB (<http://www.hmdb.ca>) did not contain a compound with mass within 3ppm of the observed feature's mass. Free fraction is the level in plasma ultrafiltrate as a percent of the total plasma level. <sup>b</sup> indicates peak areas in deproteinized plasma samples were too small to obtain more than one value for the clearance<sub>total</sub> and the free fraction. <sup>c</sup> indicates peak areas in deproteinized plasma samples too small to measure in all subjects. Standards matched indicates features matched to reagent compounds by accurate mass, retention time, and mass spectrometric fragmentation. Standards not matched are candidate reagent compounds that did not match retention time and/or mass spectrometric fragmentation with features having similar exact mass values. <sup>d</sup> 3-Methyladipic acid and pimelic acid were run as standards and both had retention

times and MS/MS product ions with  $m/z$  97.0664 and 115.0769 in negative mode which were indistinguishable from those of the feature with exact mass 160.0736. In 71 of 90 cases, corresponding features were identified in dialysis patients.

Hemodialysis/Normal ratios were obtained by comparing peak areas corresponding to individual solutes in pre-treatment plasma from 6 hemodialysis patients and plasma from 6 normal subjects. In 19 of 90 cases, features corresponding to solutes identified as efficiently cleared in normal subjects were not identified in a second LC/MS run comparing dialysis patients and controls, as indicated by an \* in the "Hemodialysis/Normal" columns. <sup>e</sup> indicates  $q < 0.05$  for elevation of the solute concentration in hemodialysis patients above the level in normal subjects.

**Supplementary Table 3 – Tandem Mass Spectrometry (MS/MS) of Features Chemically Identified as Solutes Efficiently  
Cleared by the Kidney**

| <b>Solute</b>            | <b>Mass (<i>m/z</i>)</b> | <b>Ion Mode</b> | <b>Collision Energy (eV)</b> | <b>Product Ions (<i>m/z</i>)</b> |
|--------------------------|--------------------------|-----------------|------------------------------|----------------------------------|
| Cinnamoylglycine         | 204.0666                 | Neg             | 30                           | 160.0771<br>117.0715             |
| 3-Hydroxy hippurate      | 194.0458                 | Neg             | 30                           | 150.0564                         |
| Indoxyl sulfate          | 212.0023                 | Neg             | 30                           | 80.9658<br>132.0459              |
| 1,3,7-Trimethyluric acid | 209.0681                 | Neg             | 30                           | 194.0447                         |
| 2-Furoylglycine          | 168.0303                 | Neg             | 30                           | 124.0409<br>67.0196              |
| Methylsuccinic acid      | 131.0352                 | Neg             | 30                           | 87.0458<br>113.0250              |
| 1,7-Dimethyluric acid    | 195.0522                 | Neg             | 30                           | 180.0289                         |
| Hippuric acid            | 178.0510                 | Neg             | 30                           | 134.0615                         |
| Isovalerylglycine        | 160.0965                 | Pos             | 35                           | 75.9<br>142.0                    |

|                  |          |     |    |                      |
|------------------|----------|-----|----|----------------------|
| Tiglylglycine    | 158.0810 | Pos | 35 | 82.9<br>140.0        |
| Adipic acid      | 145.0507 | Neg | 30 | 83.0508<br>101.0613  |
| p-Cresol sulfate | 187.0071 | Neg | 30 | 107.0508<br>79.9580  |
| Suberic acid     | 173.0819 | Neg | 30 | 111.0821<br>129.0926 |
